# Supplementary material
Source: Research Square preprint supplement (doi:10.21203/rs.3.rs-9417063/v1)
Supplement: Supplementary file 1 [file 50aa7d87a23d1dfece6b7147.pdf]

*Pure and Applied Geophysics*

Supporting Information for

**Spectral Characterization of Coastal Tsunami Response in Suruga Bay, Japan, Using Stochastic Simulation Ensembles**

Takuya Miyashita<sup>1</sup>, Tung-Cheng Ho<sup>1</sup>, Nobuhito Mori<sup>1,2,3</sup>, Tomoya Shimura<sup>1</sup>

<sup>1</sup> Disaster Prevention Research Institute, Kyoto University, Kyoto, Japan.

<sup>2</sup> Typhoon Research Center, Yokohama National University, Kanagawa, Japan.

<sup>3</sup> School of Engineering, Swansea University, Swansea, UK.

**Contents of this file**

Figures S1: Key source parameters of the synthetic source models.

Figures S2 and S3: Bathymetry used for the numerical tsunami simulations.

Figures S4: Results of the tsunami ray tracing from the source to the coasts.

Figures S5: Sensitivity of the response function to tide gauge location.

Figures S6: Tsunami source spectra of all 300 scenarios.

Figures S7: Wavelet analysis of coastal waveforms during the 2022 Tonga meteotsunami for comparison with the predominant periods of the response function.

Figures S8: Comparison of simulated and observed tsunami waveforms at the coasts for the 2011 Tohoku Earthquake Tsunami.

Figures S9: Sensitivity of the response function to magnitude.

Figures S10: Energy contribution ratio of tsunami sources by period band in the case of the 2011 Tohoku tsunami.

## Introduction

The following figures show additional detailed information on the stochastic source model, numerical setup, consistency on the response function, and comparison of simulated and observed waveforms. All of the synthetic finite fault models that allow to replicate these results have been uploaded to Zenodo:  
<https://doi.org/10.5281/zenodo.15845359>

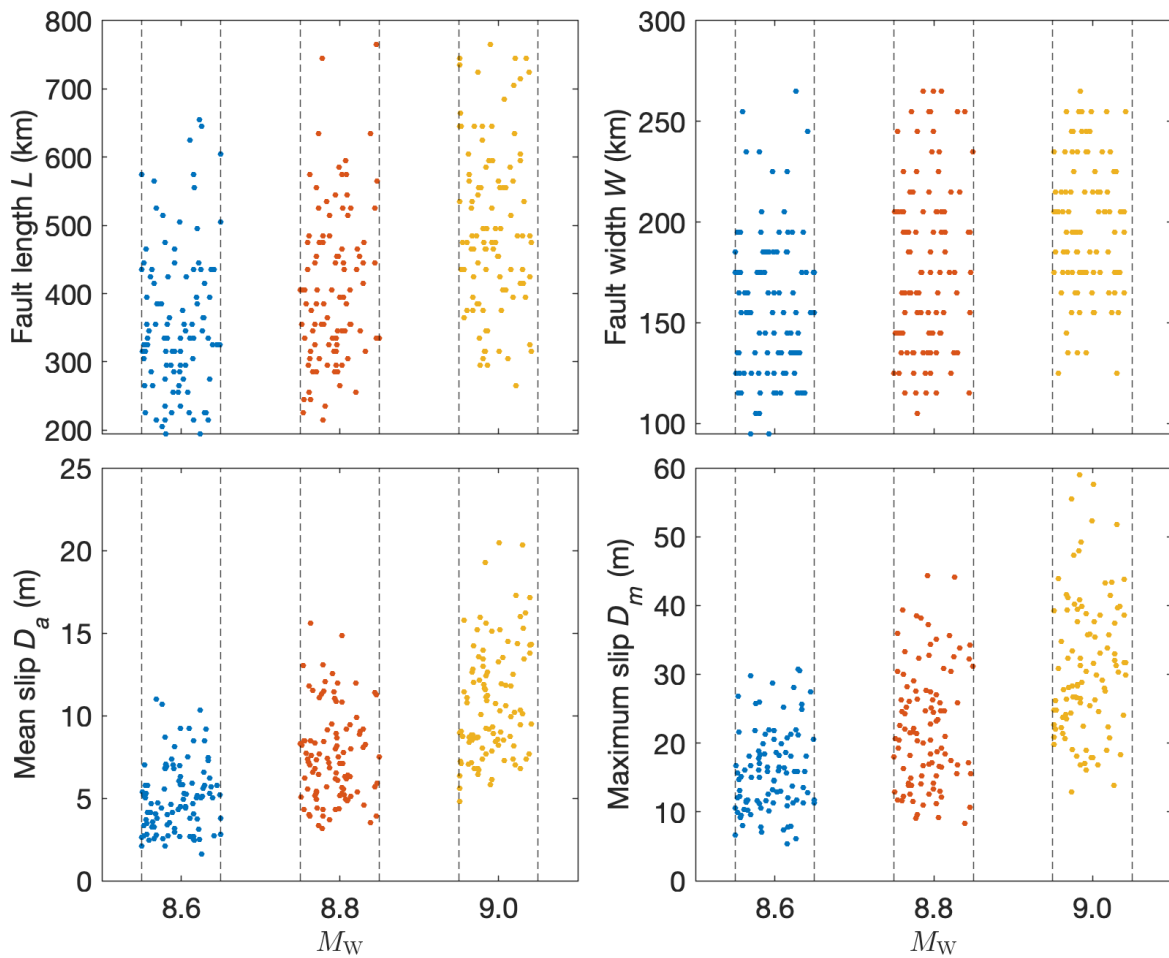

**Figure S1.** Key source parameters for the 300 fault models generated. Each panel shows the fault width, fault length, mean slip, and maximum slip. Three patterns of magnitudes are targeted, with an allowable error of  $\pm 0.05$ .

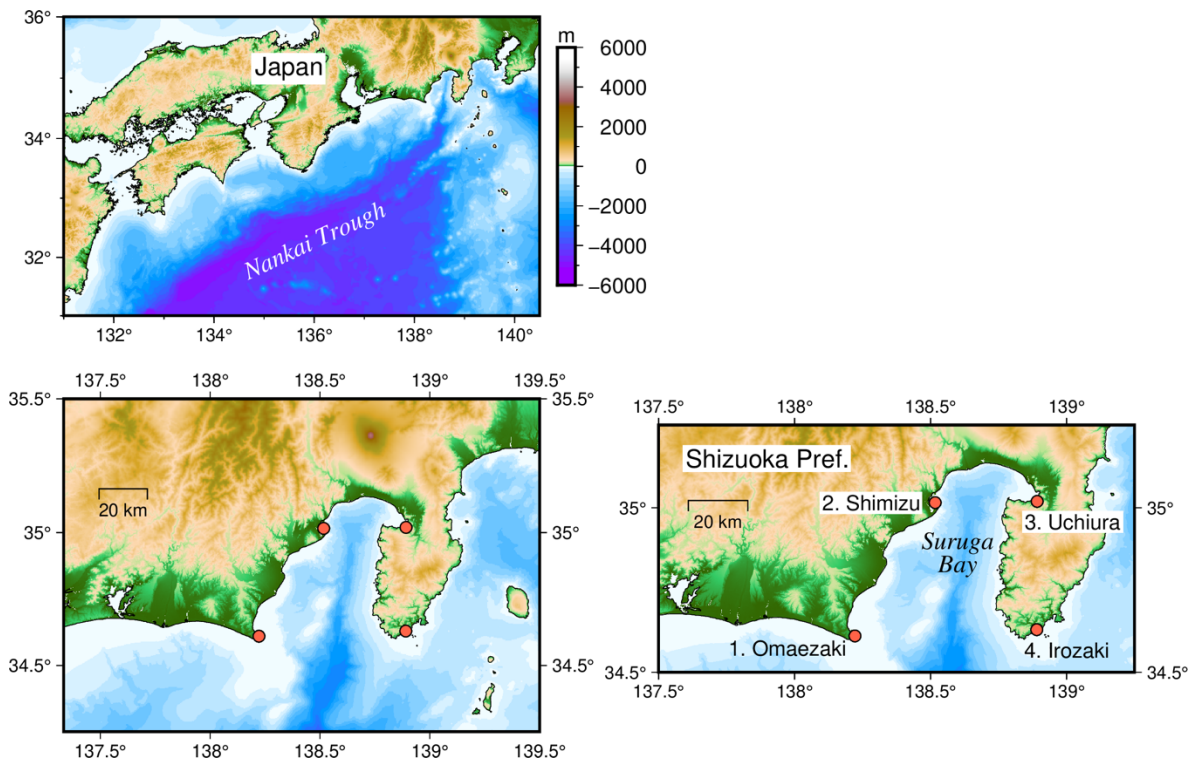

**Figure S2.** Bathymetry for numerical tsunami simulations. Each panel refers to a domain of nesting, with resolutions of 30, 10, and 10/3 arcseconds.

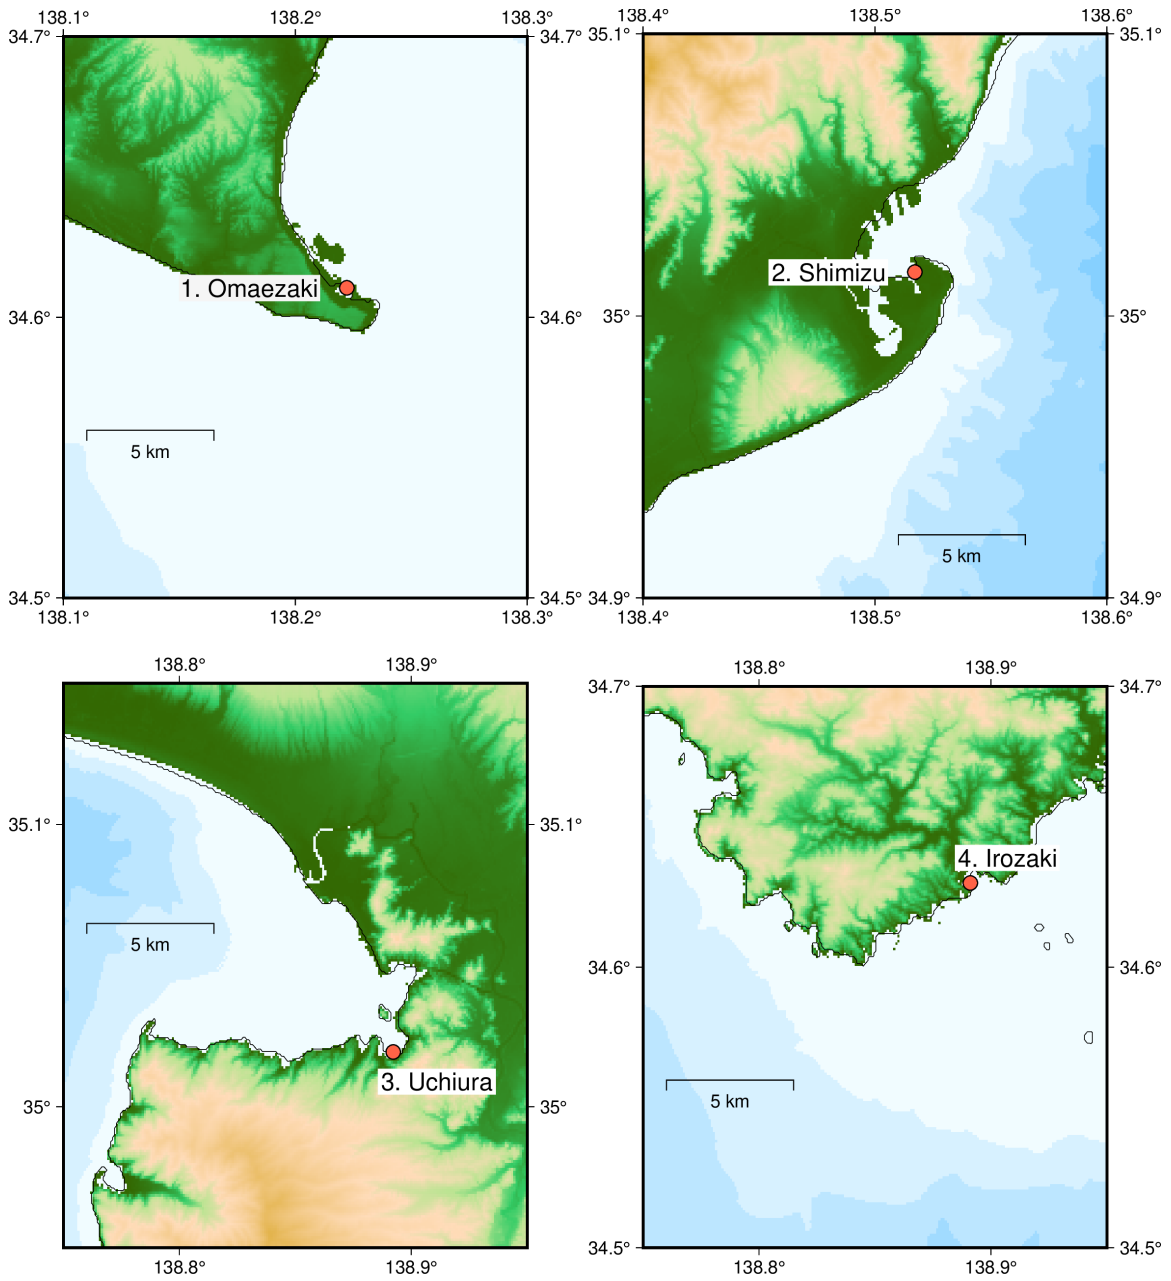

**Figure S3.** Enlarged maps of bathymetry around the four JMA tide gauges that are the focus of this study.

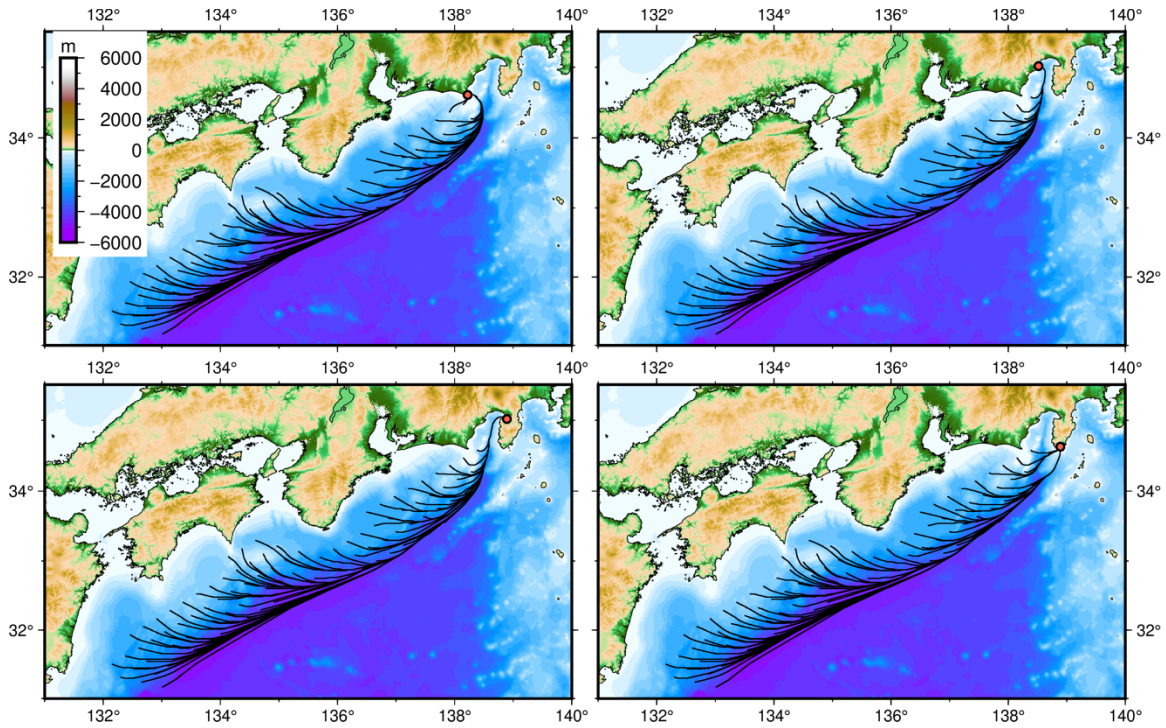

**Figure S4.** All tsunami ray paths from the source region to the coast obtained by the ray tracing method. 100 points are located in the source region and the paths to reach the 4 coastal gauges.

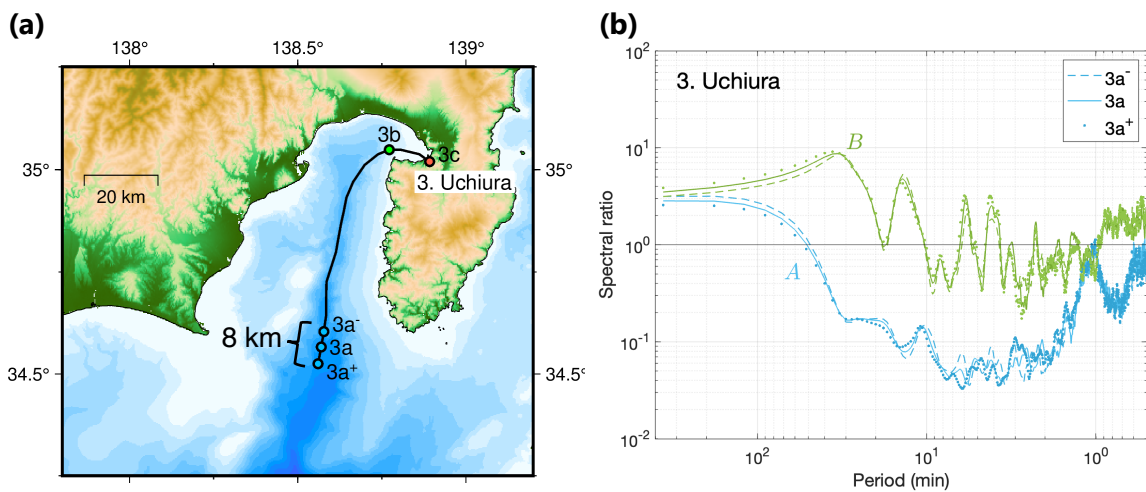

**Figure S5.** Sensitivity of the response function to different positions of the virtual gauge. (a) Difference in the position of the virtual gauge. It is slightly shifted on raypath from the original 3a location, and the distance between 3a- and 3a+ is about 8 km. (b) Comparison of response functions obtained using 3a-, 3a, and 3a+.

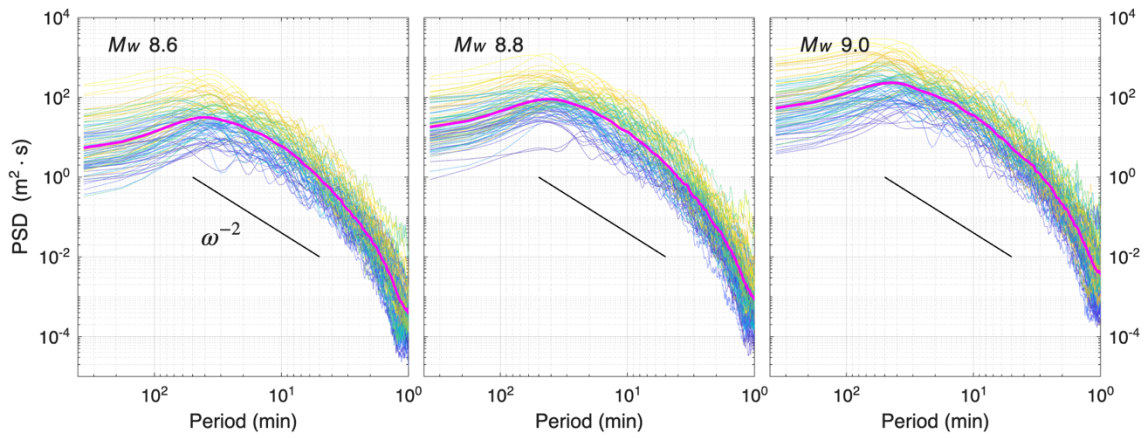

**Figure S6.** Source spectra of 300 tsunami scenarios obtained from tsunami simulations. From left to right, these correspond to moment magnitudes of 8.6, 8.8, and 9.0. The thick magenta lines represent the geometric mean of 100 source spectra for each magnitude.

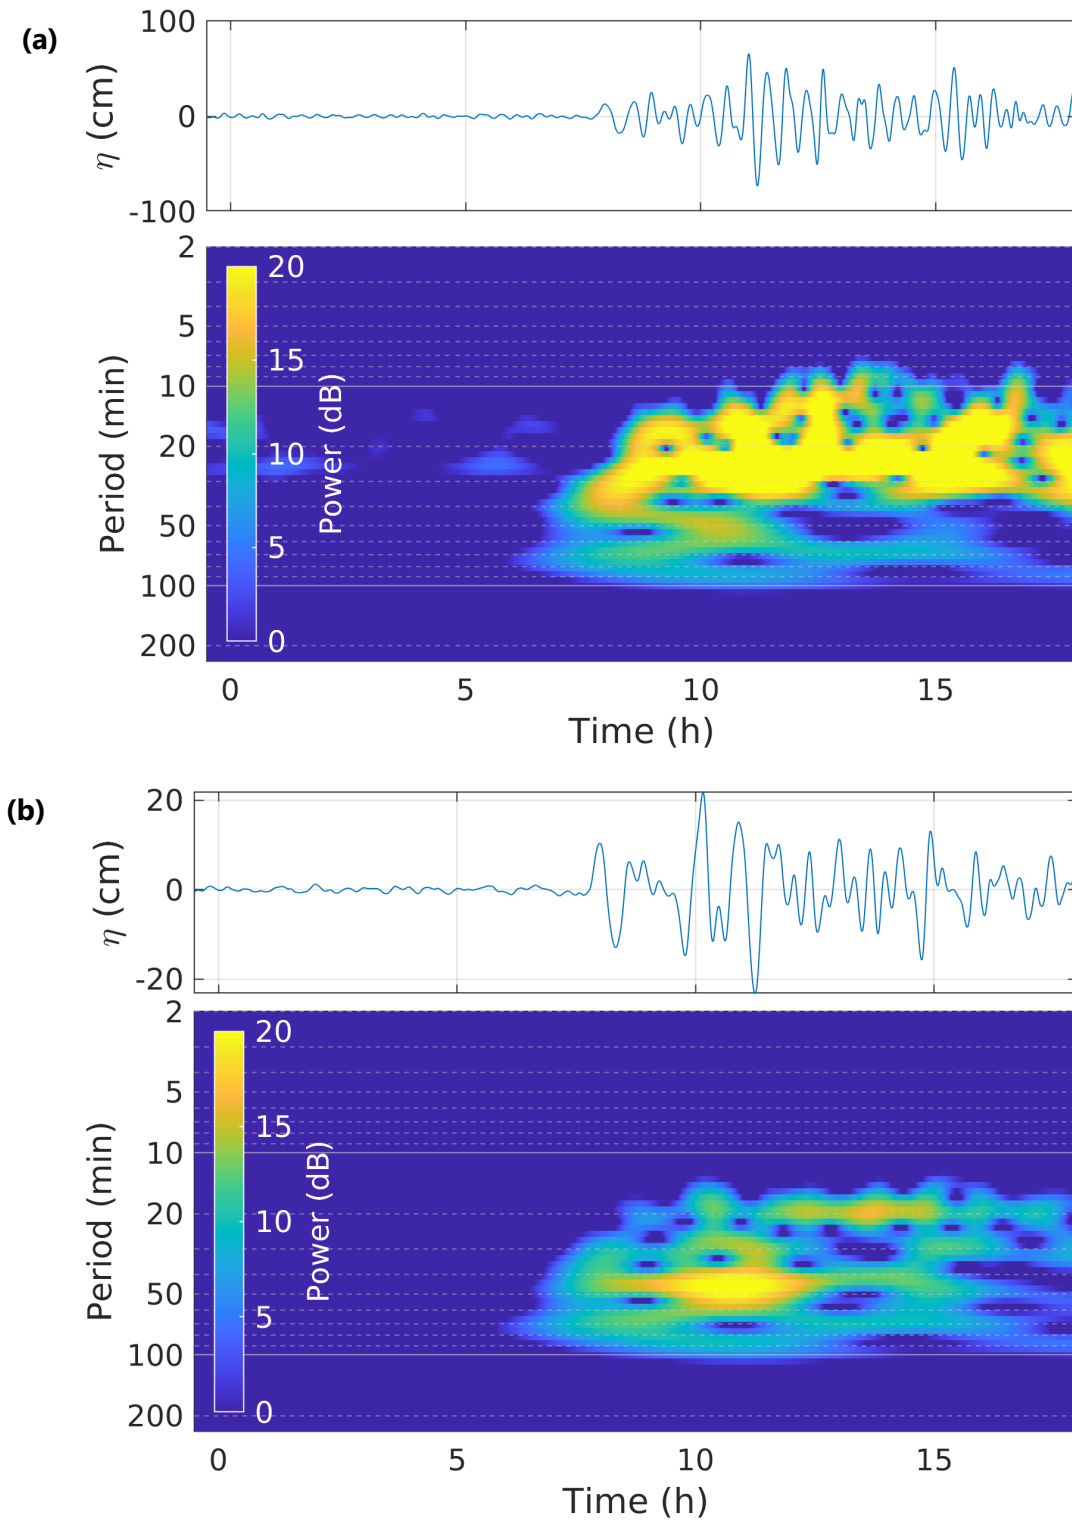

**Figure S7.** Wavelet analysis of the observed waveforms during the 2022 Tonga meteorological tsunami at four locations in this study, obtained by Miyashita et al. (2023). (a) 1. Omaezaki, (b) 2. Shimizu.

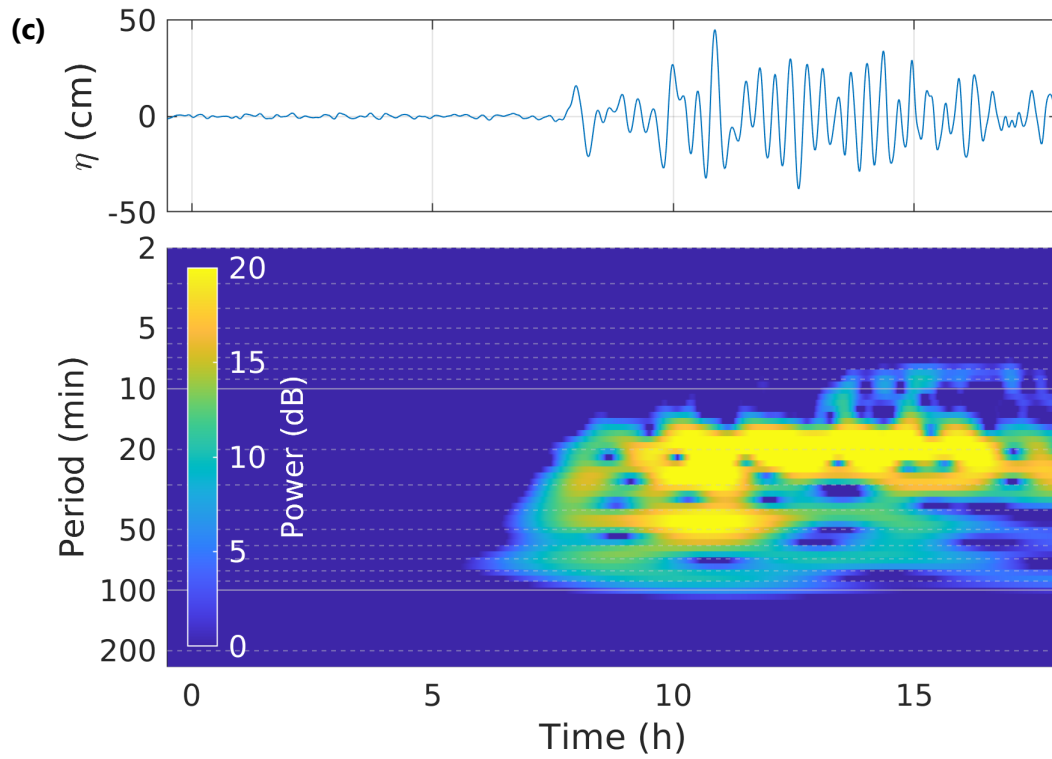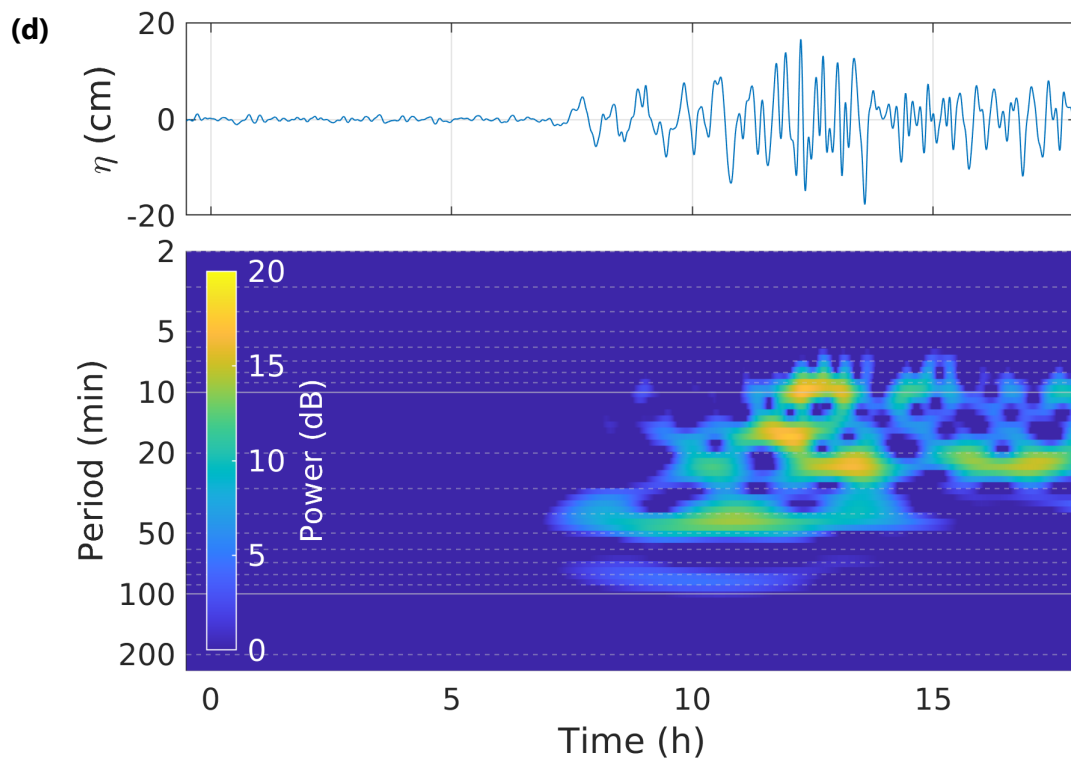

**Figure S7.** Continued: (c) 3. Uchiura and (d) 4. Irozaki

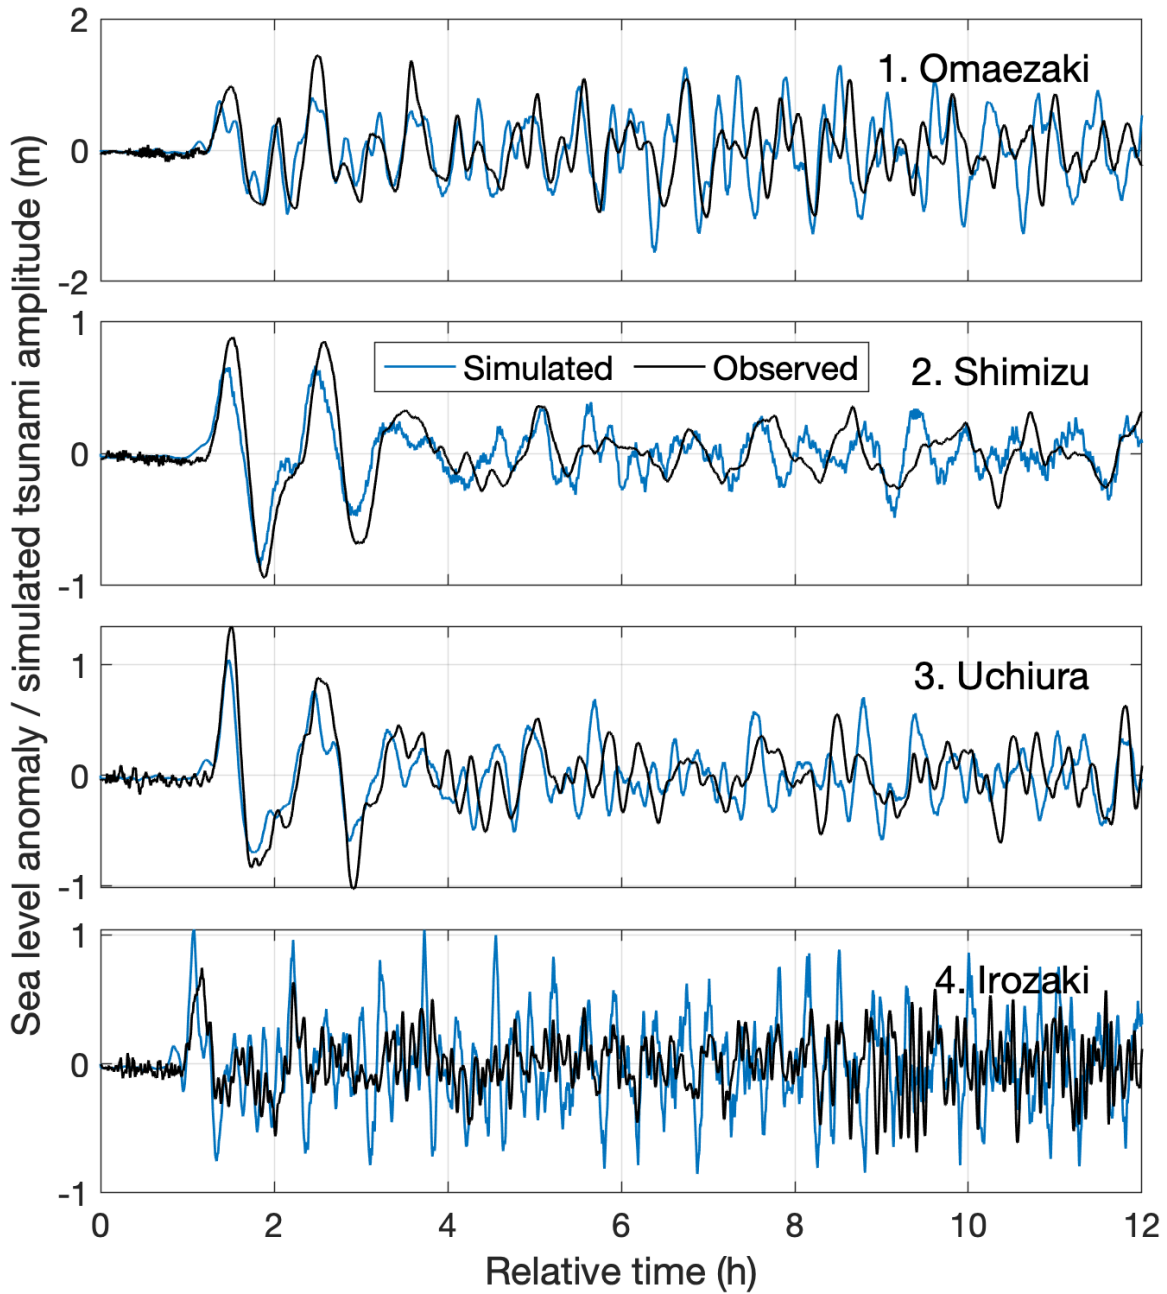

**Figure S8.** Observed tsunami waveform (black line) and computed one (blue line) using the source model of the 2011 Tohoku tsunami along the Suruga Bay coastal area. The source model used is as described in the main text.

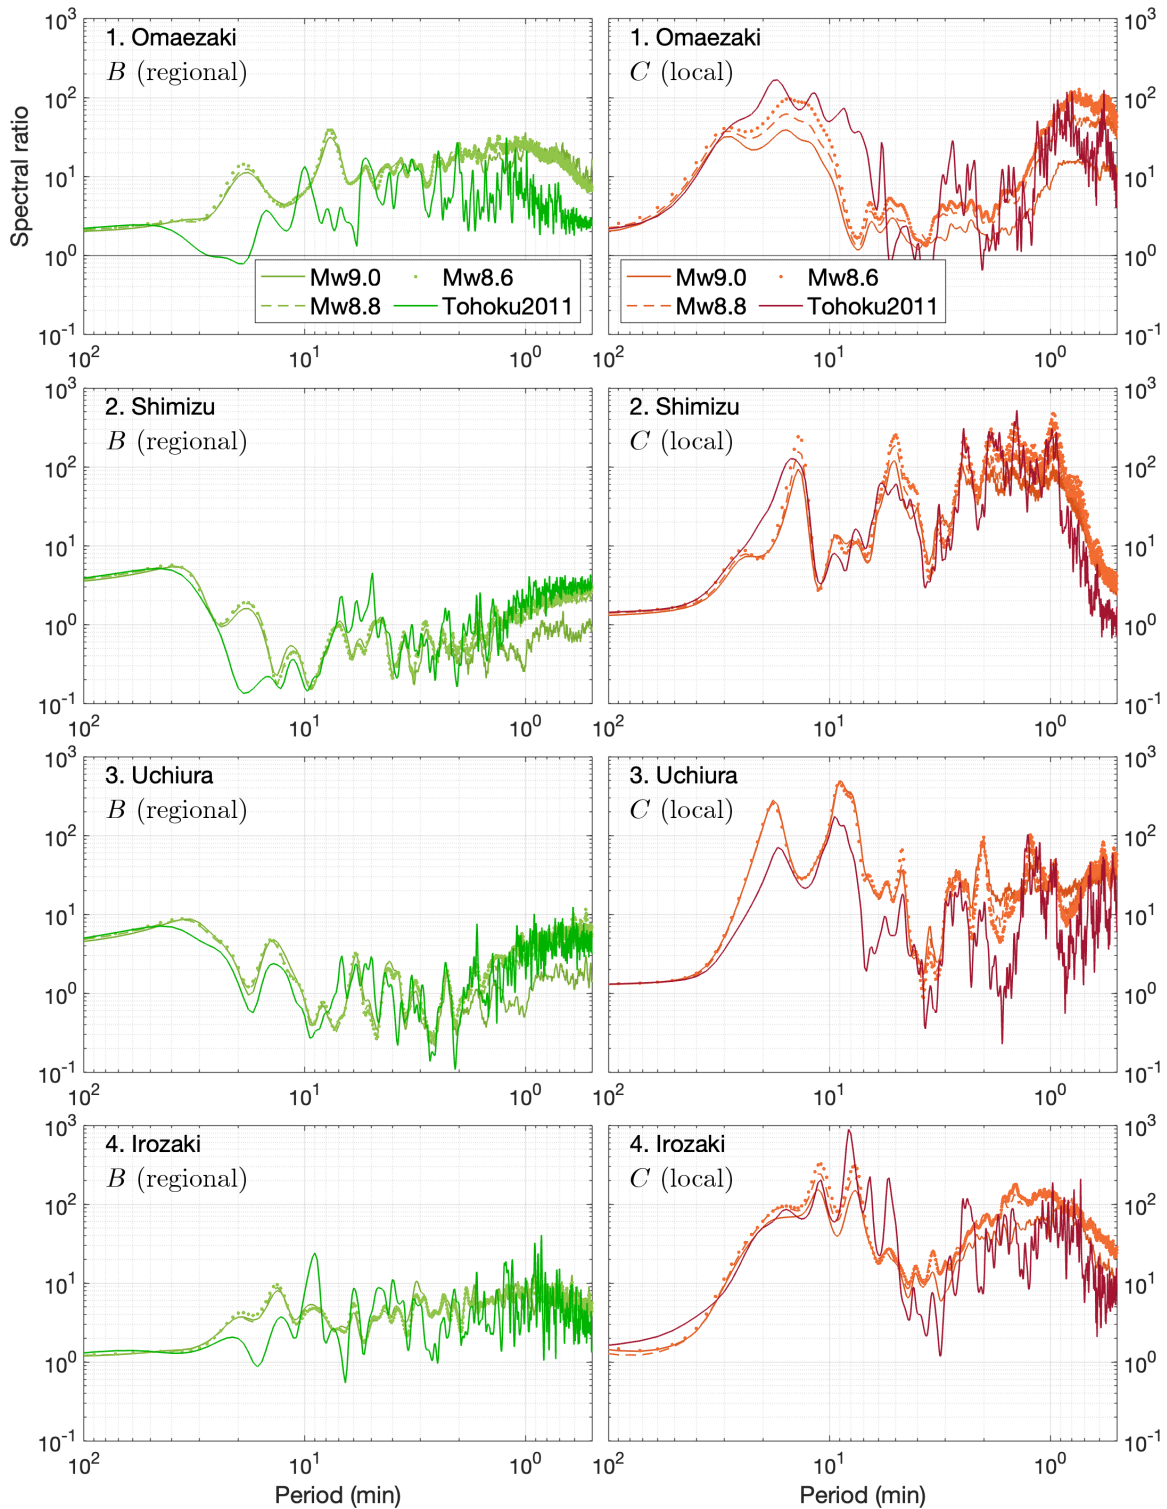

**Figure S9.** Comparison of response functions for different earthquake magnitudes and wave source areas. The left panel show regional response  $B$  and the right panel shows local response  $C$ . The difference in line type indicates either the magnitude difference or the 2011 Tohoku tsunami case.

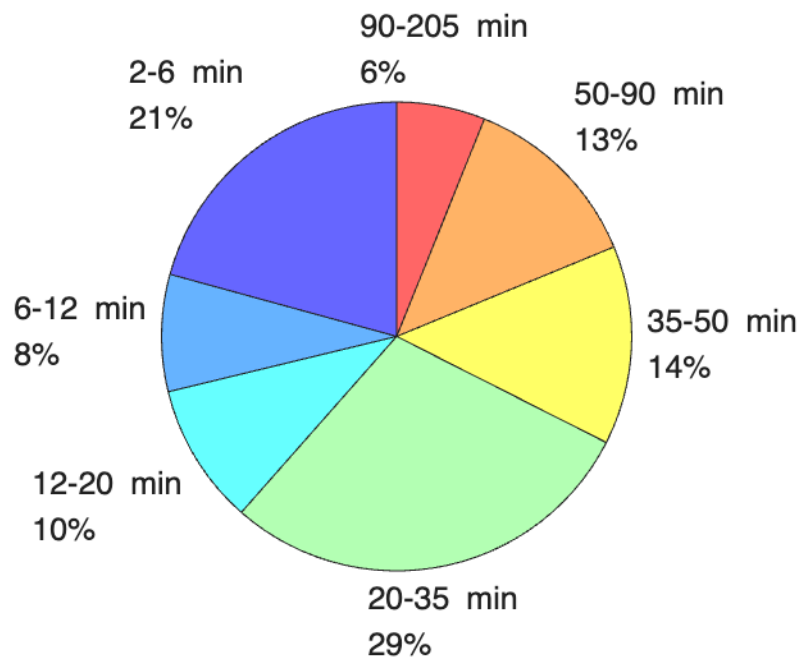

**Figure S10.** The energy contribution ratio calculated by integrating the source spectrum of the 2011 Tohoku tsunami divided into seven periodic bands. For comparison, the same periodic bands as Zaytsev et al. (2017) are used.

## References

- Miyashita, T., Nishino, A., Ho, T.-C., Yasuda, T., Mori, N., Shimura, T., & Fukui, N. (2023). Multi-scale simulation of subsequent tsunami waves in Japan excited by air pressure waves due to the 2022 Tonga volcanic eruption. *Pure and Applied Geophysics*, 180, 3195-3223.
- Zaytsev, O., Rabinovich, A. B., & Thomson, R. E. (2017). The 2011 Tohoku tsunami on the coast of Mexico: A case study. *Pure and Applied Geophysics*, 174, 2961-2986.
